# Supplementary material for: An integral proton conducting SOFC for simultaneous production of ethylene and power from ethane
Source: Royal Society of Chemistry journal article supplement (doi:10.1039/b926928b), 2010-01-01
Supplement: b926928b.pdf [file b926928b.pdf]

## An integral proton conducting SOFC for simultaneous production of ethylene and power from ethane

Xian-Zhu Fu,<sup>a</sup> Jing-Li Luo,<sup>\*a</sup> Alan R. Sanger,<sup>a</sup> Nemanja Danilovic,<sup>a</sup> Karl T. Chuang,<sup>a</sup> and Andrzej Krzywicki<sup>b</sup>

<sup>a</sup> Department of Chemical and Materials Engineering, University of Alberta, Edmonton, Alberta T6G2G6, Canada Fax: 1-780-492-2881; Tel: 1-780-492-2232; E-mail:

[Jingli.luo@ualberta.ca](mailto:Jingli.luo@ualberta.ca)

<sup>b</sup> NOVA Chemicals Corp., Calgary, Alberta, T2P5C6, Canada

### Supporting information

#### Experimental

BaCe<sub>0.85</sub>Y<sub>0.1</sub>Nd<sub>0.05</sub>O<sub>3-δ</sub> precursors were prepared using a citrate-nitrate combustion method. Stoichiometric amounts of Ba(NO<sub>3</sub>)<sub>2</sub>, Ce(NO<sub>3</sub>)<sub>3</sub>·6H<sub>2</sub>O, Y(NO<sub>3</sub>)<sub>3</sub>·6H<sub>2</sub>O and Nd(NO<sub>3</sub>)<sub>3</sub>·6H<sub>2</sub>O were first dissolved into de-ionized water. Subsequently, citric acid was added as chelating agent and NH<sub>4</sub>NO<sub>3</sub> as oxidant to form a solution in which the citric acid/total metal/ NH<sub>4</sub>NO<sub>3</sub> molar ratio was 1.5: 1: 3. Finally, the resulting solution was adjusted to about pH 8 by addition of NH<sub>4</sub>OH. The resulting mixture was heated on a hot plate until it formed a foam and then ignited.

The phase structures of materials were identified using a Rigaku Rotaflex X-ray diffractometer (XRD) with Co K $\alpha$  radiation. The shape and particle size of BCYN precursor powders were determined using a Philips Morgagni 268 transmission electron microscope (TEM). The morphology and metal concentration of BCYN membrane were determined using a Hitachi S-2700 scanning electron microscope (SEM) with energy dispersive X-ray spectroscopy (EDS).

The fuel cell was set up by placing the MEA between concentric pairs of alumina tubes and sealed in a tubular furnace. All electrochemical tests were conducted using a Solartron 1287 electrochemical interface together with 1255B frequency response analysis instrumentation. The outlet gases from the anode chamber were analyzed

using a Hewlett-Packard model HP5890 GC.

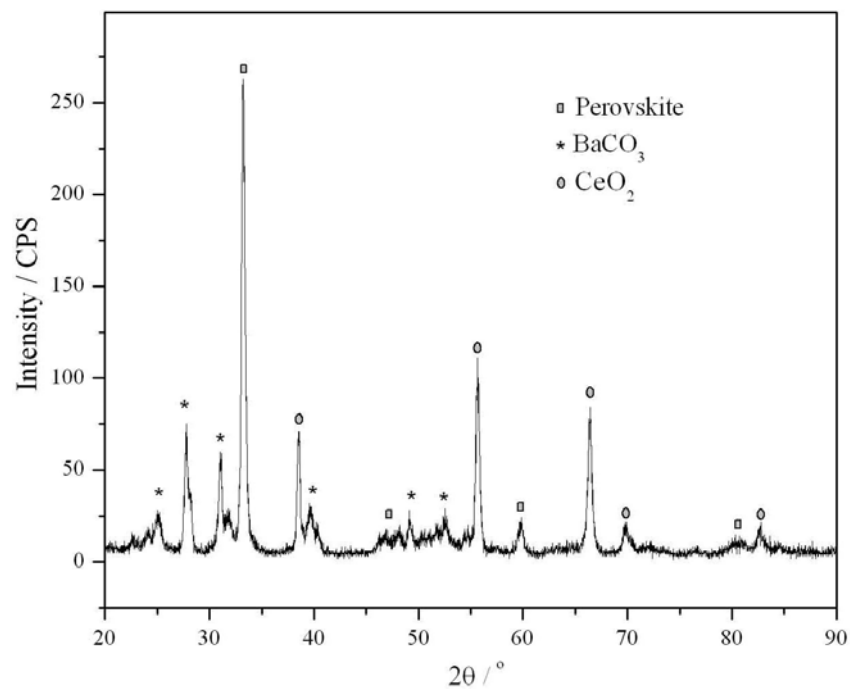

**Fig. S1.** XRD pattern of BCYN precursor.

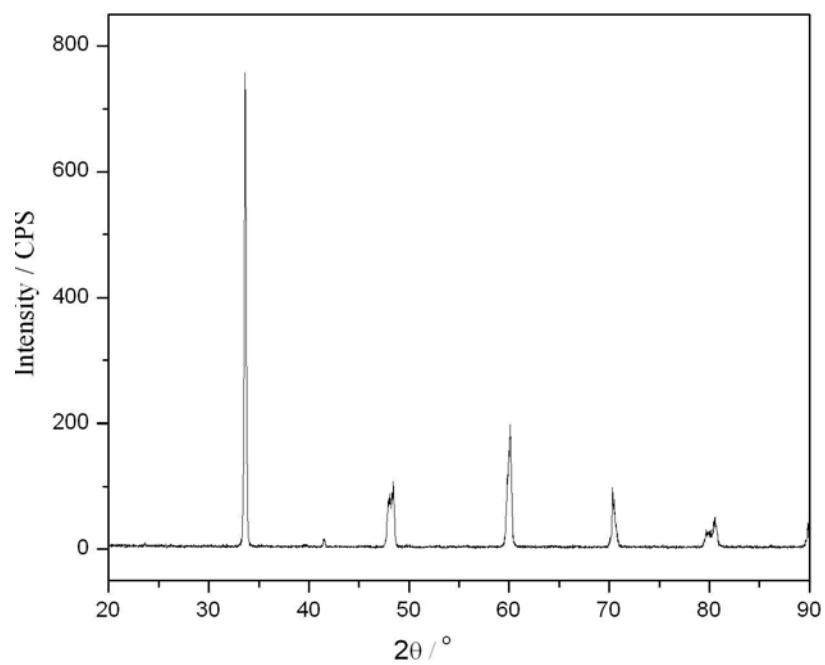

**Fig. S2.** XRD pattern of tri-layered BCYN membrane after sintering.
